# Supplementary material for: Analysis of prognostic genes in the tumor microenvironment of lung adenocarcinoma
Source: PeerJ. 2020 Jul 23;8:e9530. doi: 10.7717/peerj.9530 (PMC7382940; doi:10.7717/peerj.9530)
Supplement: Supplemental Information 1 [file peerj-08-9530-s001.xlsx]

## Sheet: Sheet1
Stromal-down	Immune-down	Immune-down & Stromal-down	Immune-up	Stromal-up	Immune-up & Stromal-up
FSTL1	RBP5	CASS4	AMBP	ENO3	FGA
FAM38B	TSPAN32	KCNMA1	AKR1B10	CPS1	AGXT2L1
MMP2	TNIP3	PSTPIP1	HGD	SLC14A2	NPW
PKNOX2	ZAP70	SPIB	DDC	BPIL1	GPX2
FIBIN	GRAP2	IL12RB1	C20orf70	MYCN	PART1
XPNPEP2	MEFV	FGL2	CYP4F3	FGG	GLTPD2
TMEM130	PTPRCAP	CRTAM	AKR1C1	SLC44A5	AKR1C2
CYP26A1	CCNA1	CXCL14	CKMT1A	MAGEA12	INSL4
ADAM12	CXCR4	MATK	CYP4F11	KIF1A	S100P
IGF1	APOB48R	CHRDL1	CKMT1B	RCOR2	CPLX2
PLAU	NCF4	NCF1C		MAGEA3	INHA
LAMA2	GP1BA	NCF1B		LOC145837	FGL1
C1R	APOBEC3D	LILRA4		PITX2	FXYD4
GJD3	SLC28A3	AMICA1		CABYR	C6orf176
WISP2	GZMM	CD300C		CALCA	WDR72
CPXM2	FCRL6	MMP7		WNK2	PAH
ZNF385D	HCP5	RTN1		LOC100190940	NR0B1
HS3ST3A1	FGR	LILRB2		PLUNC	FGB
MSC	IRF1	SIRPB2		PRAME
MMP13	KEL	C1QC		LGSN
ITIH5	CD1D	CILP		BARX1
CACNA2D1	TRIM22	SLC2A5		HOXC13
ZEB1	FAM129C	BTLA		CASKIN1
FAT4	NAPSB	KBTBD8		H19
MSRB3	LOC400696	NLRC4		COL25A1
HEPH	RUNX3	C7orf58		AKR7A3
UNC5B	POU3F1	KCNE1		C21orf125
SYNPO2	HCST	C16orf54		SLC16A14
NUDT10	TLR1	AQP9		MAGEA6
KIAA1199	CCL4L2	CD4		PODXL2
PCOLCE	RAC2	DOCK2		MAGEA2
CDH13	SLC8A1	HLA-DRB5		MSMB
SERPINF1	AP1S2	SPN		MAGEA1
DKK2	CLC	FPR3		CRLF1
ST6GALNAC5	TEKT1	PRAM1		TMEM59L
NXPH3	CST7	SH2D1A		TFF1
LRFN5	GPR55	CXCL13		B4GALNT4
A2M	CCDC141	GIMAP8
TIMP3	LRRC33	ALOX5
GLT8D2	CD38	PLEK
CNN1	SERPINB9	NLRP3
MXRA8	APOE	RNASE6
COL1A1	RASGRF1	SAMD3
PLN	RAB37	LAX1
VGLL3	FLT3LG	CCL22
TBX5	FAS	GPNMB
APCDD1L	C9orf139	CD33
SHISA3	CLEC2B	PTPN22
MRVI1	RARRES3	MAP1LC3C
SLC1A7	DNASE1L3	FCGR2B
GFPT2	KIR2DL4	PRKCB
GHR	FAM159A	GVIN1
SCUBE3	TMEM156	SIGLEC8
PODN	DUSP2	C5AR1
ROR2	AICDA	PIK3R5
ISM1	CD6	ARHGAP30
XIRP1	CTSW	SLCO2B1
COL15A1	APOL4	SIGLEC9
DACT3	GHRL	CPNE5
PABPC5	RHOH	MEOX1
MUC16	STAT4	ADAMDEC1
VAT1L	CD40	CD1A
LOC401463	HVCN1	FOXP3
SEMA3A	GMFG	PTGDR
FNDC1	KLHDC7B	SELL
BCHE	DPYD	CCL19
SERPING1	LRRK2	CLEC4E
PCDH7	PIGR	TMEM150B
MMP16	TAP1	HTR7
JAKMIP2	LAG3	TNFRSF9
TNFRSF11B	DAPP1	IKZF1
LRRC4C	GPR171	MS4A2
EMILIN1	C17orf60	LAIR1
LRRC17	TM6SF1	LOC96610
PDZRN3	CHI3L1	EVI2A
ADAMTS16	CD300A	PLA2G2A
RGS4	CIITA	GIMAP1
EDNRA	44075	DOCK8
TMEM200A	MCOLN2	GYPC
HMCN1	LPXN	LILRB4
MRGPRF	C6orf105	POU2AF1
PPAPDC3	IL1RL1	CYSLTR2
PPBP	HLA-DPB2	GPR114
CPEB1	SNX10	C3AR1
CDH2	GFI1	SAMSN1
FLNC	KLRC2	FCN1
CLSTN2	ABCB1	NCF2
SGIP1	GPR132	ADAM19
MFAP5	ITGB7	HLA-DRA
FGF1	NKG7	SLC9A9
FCGBP	KLRC1	RCSD1
APLNR	PVRIG	FYB
CST1	ZNF80	RNASE2
ITGA8	MAP4K1	HHLA2
KCNQ5	CSTA	LY86
CACNG4	TBX21	PIK3AP1
ADAMTS2	RRAD	SLAMF1
TCF4	CASP5	RASGRP2
ALDH1L2	RASSF4	FCRL3
ALDH1A2	FABP3	C13orf18
TSHZ2	PLA1A	IKZF3
KIAA1755	CARD9	FERMT3
ZNF366	TTC24	ANXA8L2
STON1	CTSS	PILRA
FHL1	TNF	KIAA0748
FN1	RP1	SIGLEC14
ATP10A	LCK	CD53
LOXL1	KLRK1	MT1M
PRRX1	AIM1	CXCL11
BHLHE22	NCR3	PNOC
PRND	IL1A	ARHGAP15
ARHGAP28	JAKMIP1	PLXNC1
LTBP2	PTCRA	FCGR1B
SFRP2	CXCR2P1	DOCK11
SV2B	TMC8	HLA-DQB1
ABCA8	SELP	LILRA6
TNFAIP6	ANKRD22	C12orf59
WT1	LTB	CCL17
HRH2	HCG26	GZMK
AOC3	SAMD9L	PTGFR
NPTX2	TNNI2	LRRC25
ZFPM2	TMIGD2	IL5RA
PDGFRB	CD7	MNDA
OMD	ETV7	HK3
COL6A2	S1PR4	EMR1
FBLN1	RAB33A	TRAT1
SVEP1	CASP1	MS4A6A
TMEM47	CD8A	FAIM3
NTM	PLA2G4C	STAP1
HSPB2	LOC284749	ABCD2
JPH2	SFTPD	BTK
FRMD6	STX11	CD180
CNRIP1	ARHGAP25	TAGAP
ANK2	OSM	HCK
SPON1	B2M	IL22RA2
NALCN	APOBEC3A	TFEC
PREX2	GLIPR2	KLHL6
PI15	RASAL3	IL13RA2
COL5A2	FAM78A	TRPV2
LMOD1	GBP2	TIFAB
ELN	IL4I1	TIGIT
VIM	KLRG1	TCF21
THY1	CCL4	ATP8B4
ADAMTS4	ITPRIPL1	EGR2
C5orf46	IL15	SLA
SLIT3	PLEKHO2	ST8SIA1
ANTXR1	PRF1	HLA-DPA1
HR	EREG	CPVL
SHANK1	RUFY4	CCR2
AKAP2	CLIC5	CEACAM4
SPP1	SRGN	CCL14
GLI1	KCNJ10	SIRPB1
PLAC9	EPSTI1	FCER1A
GPR176	KLRC4	ANXA8
GALNTL2	SCGB3A1	KCNMB1
MYH11	ADRB2	TLR8
MATN3	CD72	DES
LRRN4	CD3D	HLA-DOA
C1QTNF7	SLC6A20	HLA-DMB
LPPR4	PIK3CD	P2RY8
FAM196B	AREG	FLJ40330
NEGR1	SLC31A2	CD27
NPR3	UBD	TNFRSF17
SSC5D	FHAD1	RSPO1
HAS2	BCL11B	SIRPG
MRC2	ART4	CD226
PRDM6	GPR18	SLAMF8
NOX4	MIAT	GPR141
MCHR1	C19orf38	AMPD1
CD200	S100A8	GPR174
TM4SF18	TNFRSF13C	OLR1
SLC16A2	CLEC6A	FCRL2
RUNX1T1	OASL	FAM49A
CTSK	TNFAIP3	C4orf7
CD93	GPM6A	NCF1
SULF2	GBP4	CD2
SEMA7A	TREML2	HPGDS
HTRA3	AGAP2	IL21R
MGP	PDE6G	P2RY12
KCNN3	ABI3	FCGR3A
LRRC15	IL18RAP	PYHIN1
SFRP4	CARD16	WDFY4
WBSCR17	CD68	ABI3BP
CILP2	XCL2	SIGLEC1
ITIH3	SFTPA1	MSR1
PCDHGA9	TNFSF12-TNFSF13	C6orf97
FMOD	UBASH3A	S100B
KLHL4	HLA-DRB6	TM7SF4
GPR1	CCRL2	LAT2
MXRA5	GNLY	LST1
ITGB8	LGALS2	VSIG4
PTX3	SLA2	CMKLR1
CAMK1G	PARVG	CD79B
GXYLT2	GPR82	FLI1
CDH11	FASLG	ITK
ACAN	IFFO1	GNG2
PCDHGA12	HLA-F	ITGB2
MME	ASGR2	FOLR2
SCARF2	GIMAP2	SIT1
GREM1	IDO1	GIMAP6
KERA	PARP15	EOMES
MEIS3	MMP28	SNX20
PTGIR	DPF3	C17orf87
NTRK3	CECR1	TNFRSF8
FBN1	ERAP2	FMO1
GPR124	GZMH	NELL2
IGFL2	C11orf21	C7
C13orf33	COTL1	SIGLECP3
TSPAN2	EBI3	CHIT1
BGN	SKAP1	ZBP1
EGR3	MCART6	MRC1
HEG1	CD244	AIF1
CCL2	C1orf173	CD86
IBSP	GATA3	RGS18
MMP1	ARHGAP9	POU2F2
CPZ	SLC12A3	BLK
ZNF521	CYP4F22	LILRA5
PDE1A	NTRK2	DARC
COL13A1	C14orf73	GFRA2
GPR88	ACP5	HLA-DQA1
COL8A1	FAM65B	FAM26F
CTGF	ITGAD	SIGLEC6
FGF14	NLRC5	NFAM1
ANGPT1	C20orf85	MMP12
MYOCD	LILRB3	PTPN7
CCDC8	GZMA	COLEC12
LSAMP	IL9R	SLAMF6
HMGA2	LY75	IGJ
FHOD3	SUSD3	GPR110
UBE2QL1	ZC3H12D	PTGER4
ADAMTS12	KCNAB2	CCR7
PLXNA4	GIMAP7	BCL2A1
IGSF21	CXCR3	ANGPTL1
ASPN	CHI3L2	RGS1
MMP11	GPBAR1	CR1
SMOC2	VNN1	GAPT
PODNL1	IFI44L	DHRS9
ARHGAP20	DOK3	FGD2
TAGLN	IFNG	P2RY14
ARSI	LAT	ZNF831
PDPN	RETN	CYTH4
CACNA1C	CYP27A1	ACSM5
COL3A1	GBP1	FPR1
ARHGAP31	SPOCK2	ACAP1
MDGA1	TBC1D10C	PTPRC
COL5A3	CCL3L1	CCR4
C10orf55	APOBEC3H	CXCR5
KRT14	LPAR5	CD14
LUM	IFI30	ITGA4
C1S	CD74	IRF4
C7orf10	CORO1A	ITGAM
MOXD1	SP140	L1CAM
FAM13C	CD163L1	FAM92B
EPHA3	GABRP	TPSAB1
EDIL3	NCR1	P2RY13
ECM2	EMP3	LOC84740
CSDC2	TPK1	CD163
ODZ3	PVALB	CD37
DLG2	KLRC3	DPT
DAB2	TNFAIP8	CCL11
TBX4	VPREB3	CCL23
FAM101A	DNAH9	LOC100233209
AXL	TNFRSF1B	CD1B
LAYN	GZMB	FCGR2A
MN1	PATL2	MFAP4
PTPRD	HLA-G	TYROBP
ZNF365	SLC24A4	GPR65
FAP	MIR155HG	OSCAR
HTR2B	PLA2G7	ASAM
PTGER2	BTN3A3	CLEC4D
RANBP3L	CD247	MS4A1
PCDHGB7	TRAF1	TNC
TNFSF4	SOCS1	CCR8
TGFB3	PKHD1L1	ADAM6
NAP1L3	SERPINA9	MMP3
INHBA	CAMK4	CCL18
CDO1	C6orf174	CCR6
ADAM33	FCRL4	CNR2
IGF2	SLC15A3	F13A1
ISLR	CD70	LSP1
CHRNA1	SH2D1B	IL2RA
RARRES2	ITM2A	OGN
DKK3	NTNG1	PRG4
LRP1	ITGAX	CCR1
EPB41L2	PPYR1	PTGDS
POSTN	C1orf54	FCGR1C
PRKG1	LRRN3	HS3ST3B1
PLA2G5	INPP5D	C14orf49
TCEAL7	RGS9	SCGB1A1
FMO3	GAB3	C8orf80
CYTL1	CD96	IL10
ITGBL1	CCL5	GPR183
FGF7	SFTPA2	LILRB1
NETO1	CR2	CTSG
PPFIA2	RLTPR	TLR10
CPXM1	EMILIN2	CD80
ADAMTS15	SAA4	ALOX5AP
PPAPDC1A	IL33	PLXDC2
ENOX1	HLA-DMA	C10orf128
MYLK	C14orf139	CADM3
UNC5C	PDCD1	SAMHD1
NCAM2	GPR25	SPI1
SGCA	TMEM229B	TREM2
WNT2	IL32	MS4A4A
CSMD2	EMR4P	PIK3CG
STAB1	MYO1F	MGC29506
CYS1	HLA-B	ABCA6
SLC18A2	PRKCQ	CLECL1
WNT7A	CD8B	TCL1A
TSHZ3	JAK3	DMBT1
CCDC80	SLC6A12	CD79A
IGDCC4	MMP25	CYSLTR1
MEOX2	GPR120	FLT3
FGF2	ZBED2	CTLA4
PAMR1	TARP	PLA2G2D
NKD2	FGD3	SIRPA
SCT	APOBEC3G	ADAMTS8
EPYC	LOC100188949	TLR7
FEZ1	MYO1G	PLD4
FBLN2	GIMAP5	C13orf30
COL14A1	LILRA3	CEACAM21
SIGLEC12	KMO	GIMAP4
COMP	C14orf64	CLEC7A
RECK	DDO	SLC37A2
THBS1	PREX1	KCNA3
AEBP1	CXCR6	CCL8
RAI2	HLA-DOB	TNFSF13B
PNMAL1	STAC3	CD28
FCGR3B	PLAC8	SELPLG
PRR5L	CD101	TPSB2
CORIN	HAMP	DOCK10
SPARCL1	CFP	DBC1
KAL1	TPSD1	HLA-DPB1
THBS2	GNGT2	GPR34
NEXN	TLR2	CXCL12
ZNF423	ZNF804A	CTSE
DIO2	GPA33	SASH3
TNN	TREML1	FCGR2C
GATA5	IL18R1	BIN2
RGS22	VNN2	WNT10A
PDZRN4	CCL3	EVI2B
NID2	APBB1IP	CST6
ST6GAL2	NPL	TNFSF8
BICC1	CDA	RASSF2
C1orf150	TNFSF14	DNAJC5B
RYR2	CLEC9A	CRYBB1
MFAP2	ZNF683	CD52
SEMA3D	CLDN18	NCKAP1L
LY6H	ZBTB32	CPA3
HTRA1	APOL3	HLA-DQA2
WISP1	IL2RB	CXCL9
CBLN4	C2orf85	FAM23A
FAM26E	SCML4	ADORA3
GDF5	RGL4	CD19
KCNA5	APOC1	GBP6
FLRT2	KLRD1	ANKRD44
INMT	IL7	LILRA1
COL16A1	VAV1	RGS13
C20orf103	LOC606724	CYBB
FAT3	HTRA4	CYTIP
FGD5	ANKRD58	LTF
WSCD2	MS4A14	CLEC17A
RHOJ	DNASE2B	GGTA1
PGR	NLRC3	GAL3ST4
SRPX	ASB2	CXorf21
FBXL7	PSMB9	KCNK13
COX7A1	HCLS1	C1QB
OLFML2B	SLFN12L	LRMP
SGCD	CSF2	SIGLEC10
ABCA9	BIRC3	P2RY10
FILIP1L	LOC400759	APOC2
C19orf35	IL2RG	P2RX1
GAS1		NFATC2
PEG3		CD48
GPR85		SAA1
SERPINE1		ZEB2
VCAN		SLAMF7
RBMS3		GPR84
ALDH1A3		FCRL5
ACTG2		43891
ROBO2		C5orf20
NAV3		MAFB
BEND6		PTPRO
MAGEL2		LILRB5
CDH23		CD5
LOX		CLEC12A
ITGA11		CD3G
SULF1		RASGRP4
IQSEC3		IL7R
NBL1		SCN7A
LRRN4CL		CD209
SPSB4		TLR4
ZNF469		MS4A7
ANGPTL2		CXCL10
SSPN		CCL21
HS3ST2		FMO2
F5		IL16
ISLR2		SLC7A7
ITGA9		LCP2
KIRREL		IL10RA
GRP		TNFRSF13B
PDGFRA		SLC1A3
DOK5		VCAM1
COL6A3		PTAFR
CLEC4G		CD1E
PDLIM3		SFTPC
C18orf1		DPEP2
PCSK5		KIAA0125
BOC		ARHGEF6
CCBE1		GLIPR1
CHSY3		DTHD1
TIMP2		PPP1R16B
ITGB3		GAS7
SEMA5A		SIGLEC5
TLL1		HHIP
GSTM5		HLA-DRB1
CALD1		ADH1B
COL10A1		ATP6V0D2
COL6A1		TRAF3IP3
NLRP12		PPP2R2B
MMRN1		CD300LF
SPARC		CD84
DDR2		FCER2
KCTD12		LYZ
GPR87		RARRES1
COL5A1		CLEC5A
REM1		MEI1
ACTA2		LAPTM5
FREM1		FABP4
LAMA4		LCP1
COL11A1		DOK2
HTR2A		HAPLN3
FOXF2		CXCL6
PRELP		MPEG1
COL8A2		CCR5
TMEM119		EPHB6
EFCAB1		CD22
CASQ2		FCGR1A
PRICKLE1		FPR2
SLIT2		STAC
PDE1B		CSF2RA
HSPB7		FXYD1
FAM131B		CLEC4A
PMP22		HLA-DQB2
CTHRC1		IRF8
GPC6		ICOS
BCAT1		AIM2
CD300E		GFRA1
RELN		KRT5
RASGRF2		IL1B
MAMDC2		MARCO
BNC2		FCRLA
GAS6		IGSF6
TM6SF2		CD200R1
STAB2		WIPF1
NRK		PDCD1LG2
ADAMTS5		FCER1G
PTH1R		SIGLEC11
ROR1		TDO2
TMEM90B		LY9
CRISPLD2		HSD11B1
TGFBI		PI16
SNAI2		C1QA
ADAMTSL1		SAA2
TWIST1		PTGS1
C2orf40		DCN
FAM180A		GPR68
AOX1		FUT7
COL1A2		C1orf186
CYR61		KCNJ5
TMEM26		TXLNB
OLFML1		GBP5
GJA5		CD69
HGF		CX3CR1
TP63		LTA
CYP1B1		COL29A1
COL12A1		PIK3R6
XYLT1		SIGLEC7
C1QTNF1		SUCNR1
DACT1		FAM70A
LOC283731		P2RX7
PTGIS		SLC2A9
ALPK2		LOC339524
ODZ4		SCN2B
HECW1		CLEC10A
LOC399959		TIMD4
SPOCK1		CSF1R
		AOAH
		IVL
		HAVCR2
		BHLHE41
		TNFAIP8L2
		HDC
		CD3E
		FCRL1
		PAX5
		CD274
		COL6A6
		CD40LG
		MYBPC2
		C1orf162
		ITGAL
		THEMIS
		CH25H
		CSF2RB
		ROS1
		KLRB1
		CD1C
		C19orf59
		MMP9
		CCL13
